# Supplementary material for: Integrated System for Monitoring Muscular States during Elbow Flexor Resistance Training in Bedridden Patients
Source: J Healthc Eng. 2019 Jan 17;2019:4290957. doi: 10.1155/2019/4290957 (PMC6360054; doi:10.1155/2019/4290957)
Supplement: Supplementary Materials — Supplementary material file for the video clip about the GUI of the integrated system in which a healthy subject was asked to perform two sets of concentric and eccentric contractions and some real-time results were displayed to audience via the GUI. (Supplementary Materials) [file 4290957.f1.zip]

Archive with 5 entries (4 files):
- Supplementary experiments/Supplementary experiment 1 -01.avi
- Supplementary experiments/Supplementary experiment 1 -02.avi
- Supplementary experiments/Supplementary experiment 2 -01.avi
- Supplementary experiments/Supplementary experiment 2 -02.avi
- Supplementary experiments/
